# Supplementary material
Source: PubMed Central journal article supplement (PMC384727)
Supplement: pnas_101_12_4250__3.pdf [file pnas_101_12_4250__3.pdf]

**Table 4. Representation of 41 bacterial genera detected in four human distal esophageal biopsies**

| Genus detected<br>(n = 41)  |                               | Number (%) of clones |                |                |                |                    |
|-----------------------------|-------------------------------|----------------------|----------------|----------------|----------------|--------------------|
|                             |                               | A<br>(n = 186)       | B<br>(n = 205) | C<br>(n = 264) | D<br>(n = 245) | Total<br>(n = 900) |
| All four specimens (n = 13) | <i>Streptococcus</i>          | 77 (41.4)            | 66 (32.2)      | 84 (31.8)      | 147 (60.0)     | 374 (38.6)         |
|                             | <i>Prevotella</i>             | 30 (16.1)            | 55 (26.8)      | 44 (16.7)      | 28 (11.4)      | 157 (17.4)         |
|                             | <i>Veillonella</i>            | 34 (18.3)            | 37 (18.0)      | 39 (14.7)      | 18 (7.3)       | 128 (14.2)         |
|                             | <i>Rothia</i>                 | 1 (0.5)              | 2 (1.0)        | 14 (5.3)       | 5 (2.0)        | 22 (2.4)           |
|                             | <i>Megasphaera</i>            | 3 (1.6)              | 8 (3.9)        | 7 (2.7)        | 1 (0.4)        | 19 (2.1)           |
|                             | <i>Granulicatella</i>         | 7 (3.8)              | 3 (1.5)        | 2 (0.8)        | 5 (2.0)        | 17 (1.9)           |
|                             | <i>Gemella</i>                | 6 (3.2)              | 1 (0.5)        | 1 (0.4)        | 6 (2.4)        | 14 (1.6)           |
|                             | TM7                           | 4 (1.1)              | 2 (1.0)        | 5 (1.9)        | 2 (0.8)        | 13 (1.4)           |
|                             | <i>Actinomyces</i>            | 2 (1.1)              | 1 (0.5)        | 7 (2.7)        | 2 (0.8)        | 12 (1.3)           |
|                             | <i>Bacteroides</i>            | 1 (0.5)              | 6 (2.9)        | 1 (0.4)        | 3 (1.2)        | 11 (1.2)           |
|                             | <i>Clostridium</i>            | 1 (0.5)              | 2 (1.0)        | 7 (2.7)        | 1 (0.4)        | 11 (1.2)           |
|                             | <i>Haemophilus</i>            | 2 (1.1)              | 1 (0.5)        | 2 (0.8)        | 2 (0.8)        | 7 (0.8)            |
|                             | <i>Bulleidia</i>              | 1 (0.5)              | 1 (0.5)        | 2 (0.8)        | 1 (0.4)        | 5 (0.6)            |
|                             | Subtotal                      | 169 (90.9)           | 185 (90.2)     | 215 (81.4)     | 221 (90.2)     | 790 (87.8)         |
|                             | <i>Lactobacillus</i>          | 0                    | 1 (0.5)        | 25 (9.5)       | 0              | 26 (2.9)           |
|                             | <i>Fusobacterium</i>          | 6 (3.2)              | 0              | 2 (0.8)        | 2 (0.8)        | 10 (1.1)           |
|                             | <i>Leptotrichia</i>           | 0                    | 7 (3.4)        | 0              | 3 (1.2)        | 10 (1.1)           |
|                             | <i>Porphyromonas</i>          | 3 (1.6)              | 0              | 0              | 6 (2.4)        | 9 (1.0)            |
|                             | <i>Clostridiales AF287770</i> | 1 (0.5)              | 3 (1.5)        | 4 (1.5)        | 0              | 8 (0.9)            |
|                             | <i>Atopobium</i>              | 0                    | 0              | 4 (1.5)        | 1 (0.4)        | 5 (0.6)            |
|                             | <i>Bacteroidetes AJ289174</i> | 0                    | 0              | 4 (1.5)        | 0              | 4 (0.4)            |
|                             | <i>Campylobacter</i>          | 1 (0.5)              | 0              | 3 (1.1)        | 0              | 4 (0.4)            |
|                             | <i>Clostridiales AF201981</i> | 0                    | 0              | 2 (0.8)        | 2 (0.8)        | 4 (0.4)            |
|                             | <i>Selenomonas</i>            | 0                    | 2 (1.0)        | 0              | 2 (0.8)        | 4 (0.4)            |
|                             | <i>Neisseria</i>              | 2 (1.1)              | 0              | 0              | 1 (0.4)        | 3 (0.3)            |

|                                     |          |          |           |          |            |
|-------------------------------------|----------|----------|-----------|----------|------------|
| <i>Veillonella</i> 59-8-23<br>(95%) | 0        | 0        | 3 (1.1)   | 0        | 3 (0.3)    |
| <i>Clostridiales</i> AF385510       | 2 (1.1)  | 0        | 0         | 0        | 2 (0.2)    |
| <i>Delftia</i>                      | 0        | 1 (0.5)  | 0         | 1 (0.4)  | 2 (0.2)    |
| <i>Eubacterium</i>                  | 0        | 1 (0.5)  | 0         | 1 (0.4)  | 2 (0.2)    |
| <i>Peptostreptococcus</i>           | 0        | 0        | 0         | 2 (0.8)  | 2 (0.2)    |
| <i>Achromobacter</i>                | 0        | 1 (0.5)  | 0         | 0        | 1 (0.1)    |
| <i>Centipeda</i>                    | 0        | 1 (0.5)  | 0         | 0        | 1 (0.1)    |
| <i>Clostridiales</i> AF287772       | 0        | 0        | 0         | 1 (0.4)  | 1 (0.1)    |
| <i>Clostridiales</i> AF385508       | 0        | 1 (0.5)  | 0         | 0        | 1 (0.1)    |
| <i>Comamonas</i>                    | 0        | 1 (0.5)  | 0         | 0        | 1 (0.1)    |
| <i>Filifactor alocis</i>            | 0        | 0        | 0         | 1 (0.4)  | 1 (0.1)    |
| <i>Mogibacterium</i>                | 0        | 0        | 1 (0.4)   | 0        | 1 (0.1)    |
| <i>Paenibacillus</i>                | 0        | 0        | 1 (0.4)   | 0        | 1 (0.1)    |
| <i>Selenomonas</i> 9-1-<br>7(92%)   | 0        | 1 (0.5)  | 0         | 0        | 1 (0.1)    |
| <i>Shewanella baltica</i>           | 0        | 0        | 0         | 1 (0.4)  | 1 (0.1)    |
| <i>Tennerella</i>                   | 1 (0.5)  | 0        | 0         | 0        | 1 (0.1)    |
| <i>Yersinia krist</i>               | 1 (0.5)  | 0        | 0         | 0        | 1 (0.1)    |
| Subtotal                            | 17 (9.1) | 20 (9.8) | 49 (18.6) | 24 (9.8) | 110 (12.2) |
| Total                               | 186      | 205      | 264       | 245      | 900        |
