# Supplementary material
Source: PubMed Central journal article supplement (PMC384727)
Supplement: pnas_101_12_4250__4.pdf [file pnas_101_12_4250__4.pdf]

**Table 5. Representation of bacterial species in distal esophagus biopsies from four subjects**

| Species<br>(n = 95)               | Number of clones |                |                |                |                    |
|-----------------------------------|------------------|----------------|----------------|----------------|--------------------|
|                                   | A<br>(n = 186)   | B<br>(n = 205) | C<br>(n = 264) | D<br>(n = 245) | Total<br>(n = 900) |
| <i>Achromobacter piechaudii</i>   | 0                | 1              | 0              | 0              | 1                  |
| <i>Actinomyces graevenitzii</i>   | 1                | 0              | 1              | 0              | 2                  |
| <i>Actinomyces meyeri</i>         | 0                | 0              | 1              | 0              | 1                  |
| <i>Actinomyces odontolyticus</i>  | 1                | 1              | 1              | 2              | 5                  |
| <i>Atopobium parvulum</i>         | 0                | 0              | 3              | 1              | 4                  |
| <i>Atopobium rimae</i>            | 0                | 0              | 1              | 0              | 1                  |
| <i>Bulleidia moorei</i>           | 1                | 1              | 2              | 1              | 5                  |
| <i>Campylobacter concisus</i>     | 0                | 0              | 3              | 0              | 3                  |
| <i>Campylobacter showae</i>       | 1                | 0              | 0              | 0              | 1                  |
| <i>Centipeda periodontii</i>      | 0                | 1              | 0              | 0              | 1                  |
| <i>Comamonas testosteroni</i>     | 0                | 1              | 0              | 0              | 1                  |
| <i>Delftia acidovorans</i>        | 0                | 1              | 0              | 1              | 2                  |
| <i>Eubacterium sulsi</i>          | 0                | 1              | 0              | 1              | 2                  |
| <i>Filifactor alocis</i>          | 0                | 0              | 0              | 1              | 1                  |
| <i>Fusobacterium naviforme</i>    | 2                | 0              | 0              | 0              | 2                  |
| <i>Fusobacterium nucleatum</i>    | 3                | 0              | 2              | 1              | 6                  |
| <i>Fusobacterium simiae</i>       | 1                | 0              | 0              | 0              | 1                  |
| <i>Gemella haemolysans</i>        | 2                | 1              | 0              | 6              | 9                  |
| <i>Gemella morbillorum</i>        | 1                | 0              | 0              | 0              | 1                  |
| <i>Gemella sanguinis</i>          | 3                | 0              | 1              | 0              | 4                  |
| <i>Granulicatella adiacens</i>    | 7                | 1              | 2              | 5              | 15                 |
| <i>Granulicatella elegans</i>     | 0                | 2              | 0              | 0              | 2                  |
| <i>Haemophilus parainfluenzae</i> | 1                | 0              | 0              | 0              | 1                  |
| <i>Haemophilus paraphrophilus</i> | 1                | 0              | 0              | 2              | 3                  |
| † <i>Haemophilus segnis</i>       | 0                | 1              | 0              | 0              | 1                  |
| <i>Lactobacillus delbrueckii</i>  | 0                | 0              | 8              | 0              | 8                  |

|                                    |           |           |           |            |            |
|------------------------------------|-----------|-----------|-----------|------------|------------|
| <i>Lactobacillus fermentum</i>     | 0         | 0         | 2         | 0          | 2          |
| <i>Lactobacillus frumenti</i>      | 0         | 0         | 1         | 0          | 1          |
| <i>Lactobacillus gasseri</i>       | 0         | 1         | 10        | 0          | 11         |
| <i>Lactobacillus salivarius</i>    | 0         | 0         | 4         | 0          | 4          |
| <b>Megasphaera micronuciformis</b> | <b>3</b>  | <b>8</b>  | <b>7</b>  | <b>1</b>   | <b>19</b>  |
| <i>Mogibacterium vesicum</i>       | 0         | 0         | 1         | 0          | 1          |
| <i>Neisseria pharyngis</i>         | 1         | 0         | 0         | 0          | 1          |
| <i>Neisseria subflava</i>          | 1         | 0         | 0         | 0          | 1          |
| <i>Porphyromonas endodontalis</i>  | 3         | 0         | 0         | 3          | 6          |
| <i>Porphyromonas gingivalis</i>    | 0         | 0         | 0         | 2          | 2          |
| <i>Prevotella denticola</i>        | 0         | 0         | 2         | 0          | 2          |
| <i>Prevotella intermedia</i>       | 0         | 1         | 0         | 3          | 4          |
| <i>Prevotella melaninogenica</i>   | 0         | 5         | 0         | 9          | 14         |
| <i>Prevotella nigrescens</i>       | 0         | 0         | 0         | 1          | 1          |
| <i>Prevotella oris</i>             | 0         | 0         | 2         | 0          | 2          |
| <b>Prevotella pallens</b>          | <b>5</b>  | <b>2</b>  | <b>2</b>  | <b>5</b>   | <b>14</b>  |
| <i>Prevotella veroralis</i>        | 23        | 13        | 9         | 0          | 45         |
| <b>Rothia mucilagenosus</b>        | <b>1</b>  | <b>2</b>  | <b>14</b> | <b>3</b>   | <b>20</b>  |
| <i>Selenomonas sputigena</i>       | 0         | 0         | 0         | 1          | 1          |
| <i>Shewanella baltica</i>          | 0         | 0         | 0         | 1          | 1          |
| <i>Streptococcus anginosus</i>     | 0         | 0         | 0         | 1          | 1          |
| <i>Streptococcus cristatus</i>     | 0         | 0         | 0         | 1          | 1          |
| <i>Streptococcus gordonii</i>      | 0         | 1         | 0         | 1          | 2          |
| <i>Streptococcus infantis</i>      | 0         | 0         | 6         | 2          | 8          |
| <i>Streptococcus intermedius</i>   | 0         | 0         | 1         | 0          | 1          |
| <b>Streptococcus mitis</b>         | <b>1</b>  | <b>47</b> | <b>6</b>  | <b>115</b> | <b>169</b> |
| <i>Streptococcus oralis</i>        | 18        | 0         | 0         | 7          | 25         |
| <b>Streptococcus parasanguis</b>   | <b>24</b> | <b>4</b>  | <b>29</b> | <b>10</b>  | <b>67</b>  |
| <b>Streptococcus thermophilus</b>  | <b>34</b> | <b>14</b> | <b>42</b> | <b>10</b>  | <b>100</b> |
| <i>Tennerella forsythensis</i>     | 1         | 0         | 0         | 0          | 1          |
| <i>Haemophilus AB098612</i>        | 0         | 0         | 2         | 0          | 2          |
| <b>Veillonella atypica</b>         | <b>8</b>  | <b>22</b> | <b>21</b> | <b>15</b>  | <b>66</b>  |

|                                    |     |     |     |     |     |
|------------------------------------|-----|-----|-----|-----|-----|
| <b>Veillonella dispar</b>          | 26  | 15  | 18  | 3   | 62  |
| <i>Yersinia krist</i>              | 1   | 0   | 0   | 0   | 1   |
| Subtotal                           | 175 | 147 | 202 | 215 | 739 |
| <i>Actinomyces AF385521</i>        | 0   | 0   | 4   | 0   | 4   |
| <b>Bacteroides AF385513</b>        | 1   | 6   | 1   | 3   | 11  |
| <i>Bacteroidetes AJ289174</i>      | 0   | 0   | 4   | 0   | 4   |
| <i>Clostridiales AF201981</i>      | 0   | 0   | 2   | 2   | 4   |
| <i>Clostridiales AF287770</i>      | 1   | 3   | 4   | 0   | 8   |
| <i>Clostridiales AF287772</i>      | 0   | 0   | 0   | 1   | 1   |
| <i>Clostridiales AF385508</i>      | 0   | 1   | 0   | 0   | 1   |
| <i>Clostridiales AF385510</i>      | 2   | 0   | 0   | 0   | 2   |
| <i>Clostridium AF385563</i>        | 0   | 1   | 0   | 0   | 1   |
| <b>Clostridium AY278618</b>        | 1   | 1   | 7   | 1   | 10  |
| <i>Fusobacterium AF287806</i>      | 0   | 0   | 0   | 1   | 1   |
| <i>Haemophilus AB098612</i>        | 0   | 0   | 2   | 0   | 2   |
| <i>Leptotrichia AF385571</i>       | 0   | 5   | 0   | 2   | 7   |
| <i>Leptotrichia AY278621</i>       | 0   | 2   | 0   | 1   | 3   |
| <i>Neisseria AY093465</i>          | 0   | 0   | 0   | 1   | 1   |
| <i>Peptostreptococcus AF287763</i> | 0   | 0   | 0   | 2   | 2   |
| <i>Porphyromonas AY008310</i>      | 0   | 0   | 0   | 1   | 1   |
| <i>Prevotella AF366269</i>         | 0   | 11  | 2   | 2   | 15  |
| <i>Prevotella AF385512</i>         | 1   | 2   | 13  | 0   | 16  |
| <i>Prevotella AF385551</i>         | 0   | 4   | 13  | 0   | 17  |
| <i>Prevotella AF432133</i>         | 1   | 17  | 0   | 1   | 19  |
| <i>Prevotella AJ012605</i>         | 0   | 0   | 0   | 1   | 1   |
| <i>Prevotella AJ289182</i>         | 0   | 0   | 0   | 1   | 1   |
| <i>Prevotella AY005064</i>         | 0   | 0   | 1   | 0   | 1   |
| <i>Prevotella AY005065</i>         | 0   | 0   | 0   | 1   | 1   |
| <i>Prevotella AY093466</i>         | 0   | 0   | 0   | 1   | 1   |
| <i>Prevotella AY207061</i>         | 0   | 0   | 0   | 3   | 3   |
| <i>Paenibacillus AY167820</i>      | 0   | 0   | 1   | 0   | 1   |
| <i>Rothia AF543276</i>             | 0   | 0   | 0   | 2   | 2   |

|                               |                                  |          |          |          |          |           |
|-------------------------------|----------------------------------|----------|----------|----------|----------|-----------|
|                               | <i>Selenomonas AF287795</i>      | 0        | 1        | 0        | 0        | 1         |
|                               | <i>Selenomonas AF385514</i>      | 0        | 1        | 0        | 1        | 2         |
|                               | <i>TM7 AF385500</i>              | 0        | 1        | 0        | 0        | 1         |
|                               | <i>TM7 AF385506</i>              | 0        | 0        | 0        | 1        | 1         |
|                               | <b>TM7 AF385520</b>              | <b>4</b> | <b>1</b> | <b>5</b> | <b>1</b> | <b>11</b> |
|                               | Subtotal                         | 11       | 57       | 59       | 30       | 157       |
| Unknowns <sup>§</sup> (n = 2) | <i>Selenomonas 9-1-7(92%)</i>    | 0        | 1        | 0        | 0        | 1         |
|                               | <i>Veillonella 59-8-23 (95%)</i> | 0        | 0        | 3        | 0        | 3         |
|                               | Subtotal                         | 0        | 1        | 3        | 0        | 4         |
|                               |                                  |          |          |          |          |           |
|                               | Total sequences                  | 186      | 205      | 264      | 245      | 900       |
|                               | Unique sequences                 | 163      | 190      | 252      | 239      | 833       |
|                               | Total species                    | 35       | 40       | 45       | 51       | 94        |

Species/species-level operational taxonomic unites common to all four specimens are highlighted in yellow.

\*Culture-defined sequences had similarity scores  $\geq 0.873$  with 16S rDNA of cultured-defined species.

<sup>†</sup>Species defined by similarity scores  $>0.873$  with a cultivated non-type strain.

<sup>‡</sup>16S rDNA clones were defined as sequences with similarity scores  $\geq 0.873$  with 16S rDNA clones of uncultivated bacteria but not with cultured-defined species.

<sup>§</sup>Unknowns were defined as sequences with similarity scores  $<0.873$  with 16S sequences in the RDP II database.
